# Supplementary material for: Associations of circulating folate, vitamin B12 and homocysteine concentrations in early pregnancy and cord blood with epigenetic gestational age: the Generation R Study
Source: PubMed Central journal article supplement (PMC8082638; doi:10.1186/s13148-021-01065-x), 2021-04-29
Supplement: 13148_2021_1065_MOESM1_ESM.pdf [file 13148_2021_1065_MOESM1_ESM.pdf]

1        **Associations of circulating folate, vitamin B12 and homocysteine concentrations in early**  
2        **pregnancy and cord blood with epigenetic gestational age: the Generation R Study**

3

4

*Additional file 1*

5

6        Giulietta S. Monasso<sup>1,2</sup>, Leanne K. Küpers<sup>1,2,3</sup>, Vincent W.V. Jaddoe<sup>1,2</sup>, Sandra G. Heil<sup>4</sup>, Janine F.

7

Felix<sup>1,2</sup>

8

9

- 10 1. The Generation R Study Group, Erasmus MC, University Medical Center Rotterdam, Rotterdam,  
11 the Netherlands;
- 12 2. Department of Pediatrics, Erasmus MC, University Medical Center Rotterdam, Rotterdam, the  
13 Netherlands.
- 14 3. Division of Human Nutrition and Health, Wageningen University, Wageningen, The  
15 Netherlands
- 16 4. Department of Clinical Chemistry, Erasmus MC, University Medical Center Rotterdam,  
17 Rotterdam, the Netherlands.

18

19 **Content**

20        - **Figures: 2**

21

22 **Corresponding author:** Janine F. Felix, MD PhD, Generation R Study Group (Na-2918), Erasmus  
23 MC, University Medical Center Rotterdam, Rotterdam, the Netherlands. Phone: +31 10 7043405, fax:  
24 +31 10 70 44645, email: [j.felix@erasmusmc.nl](mailto:j.felix@erasmusmc.nl)

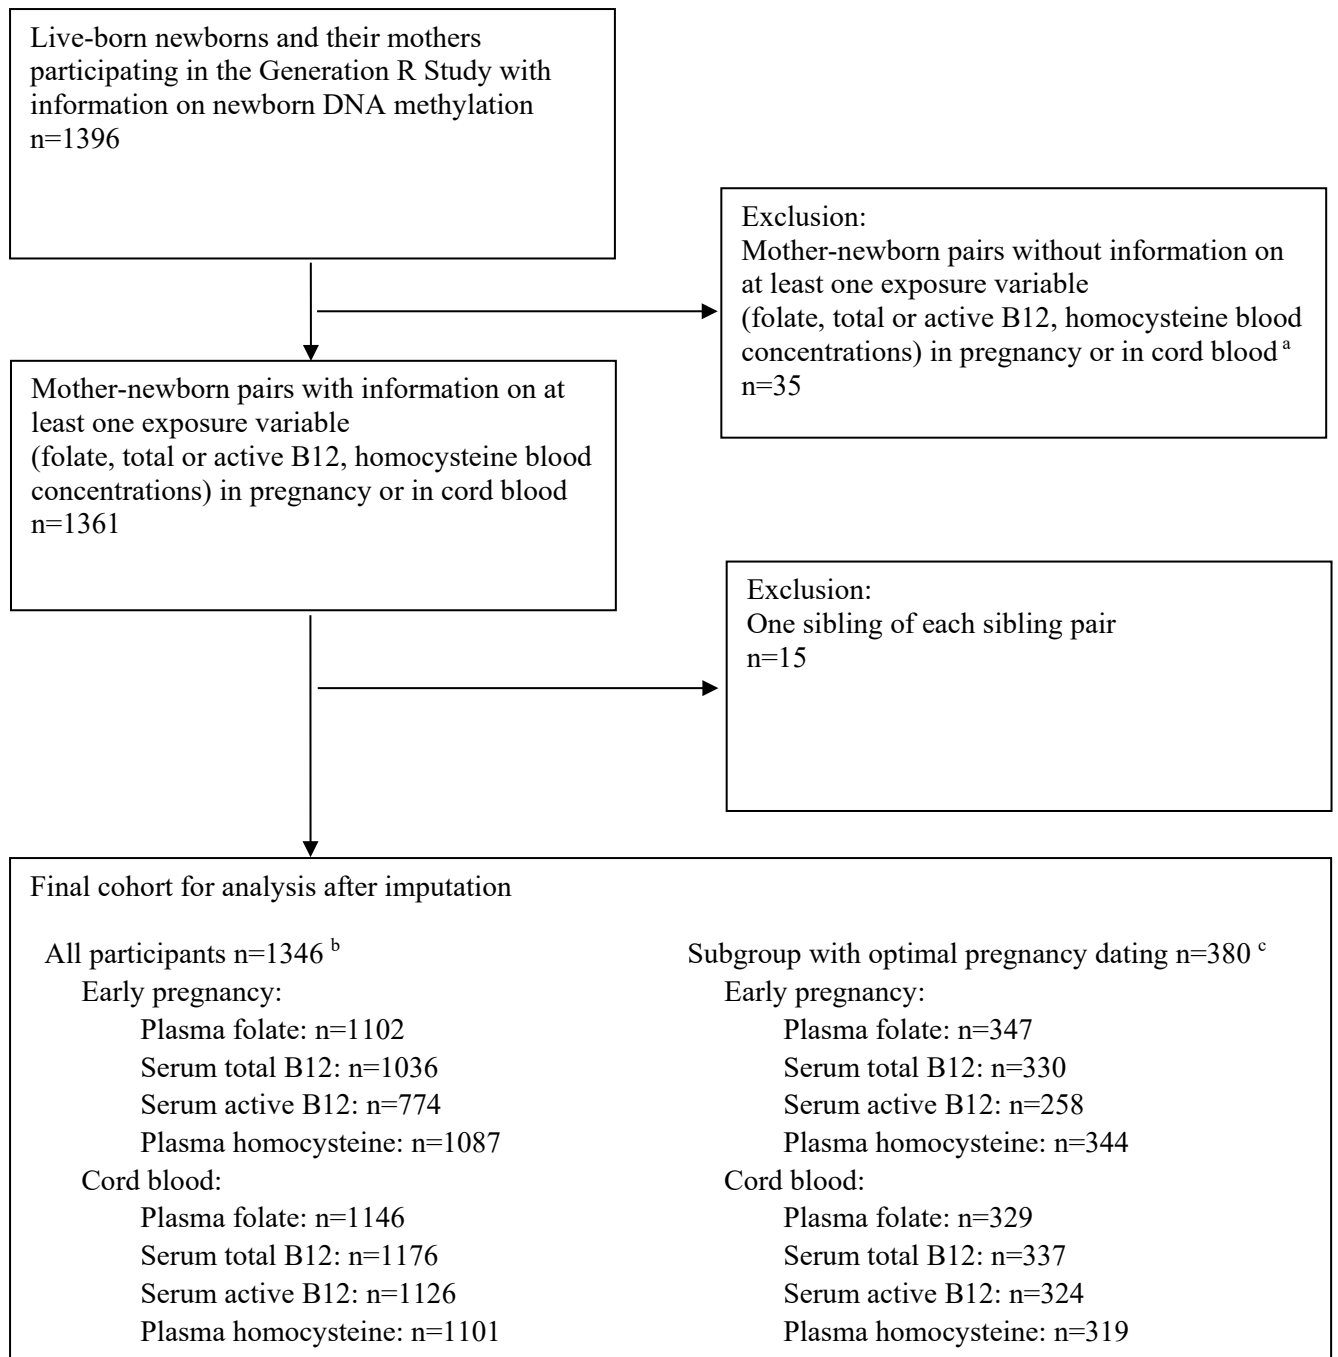

**Figure S1. Flow chart of the study population**

a The non-response analysis compared the newborns who were included in the analyses to those who participated in Generation R at birth but were not included (n=8555), because either no DNA methylation was measured (n=8505), or information on all exposures was missing (n=35), or their sibling was included in the analyses (n=15).

b For the analyses based on Bohlin’s epigenetic clock, we excluded 11 newborns with missing values for some of the required CpGs, leaving n=1335 children for analysis.

c Based on a regular menstrual cycle of  $28 \pm 4$  days and a known date of last menstrual period. For the analyses based on Bohlin’s epigenetic clock, we excluded 2 newborns with missing values for some of the required CpGs, leaving n=378 children for analysis.

## Supplemental Figure 2. Correlation between clinical and DNA methylation gestational age

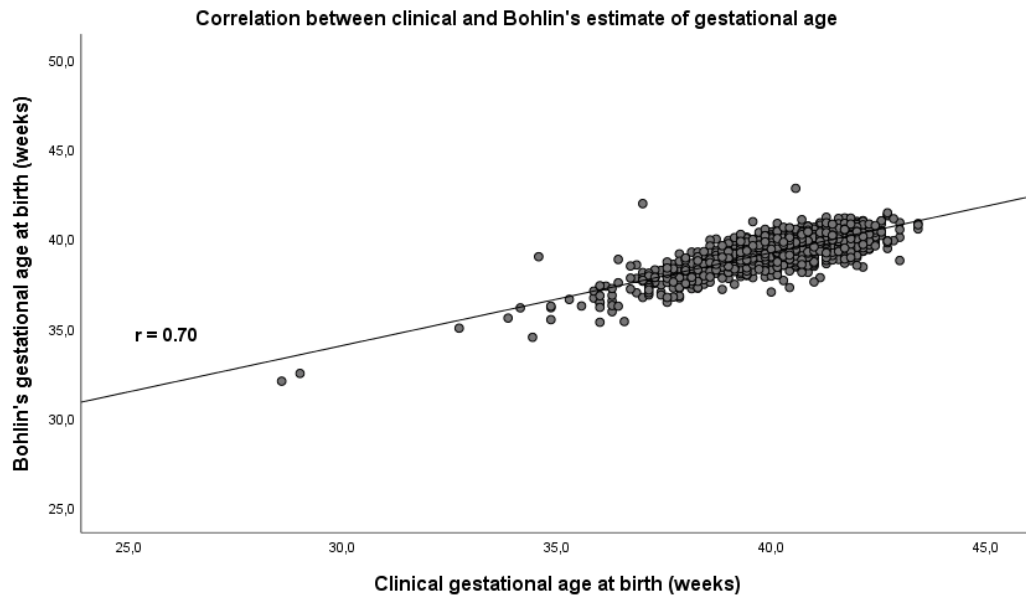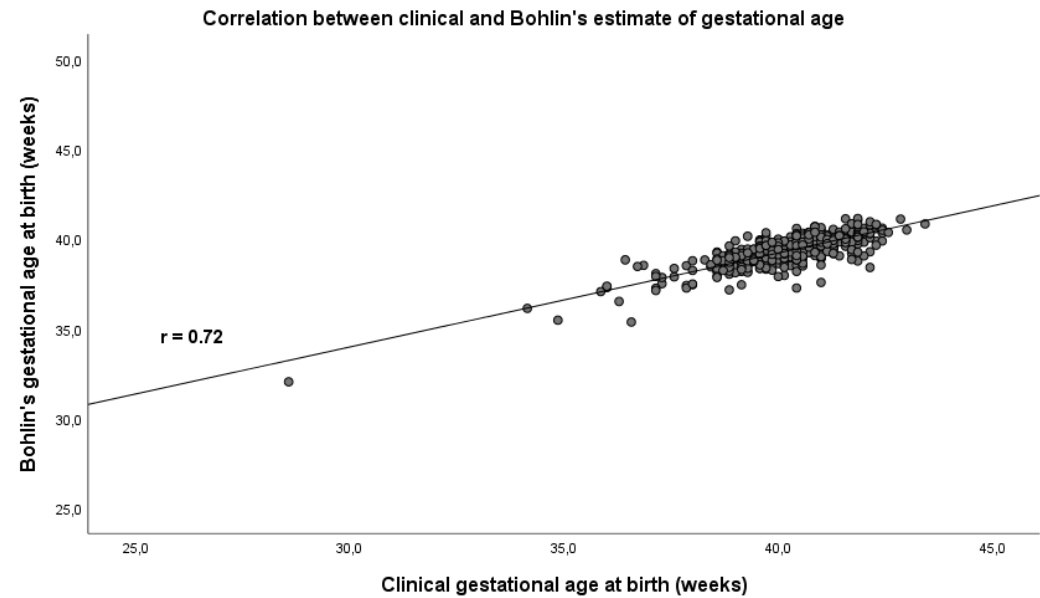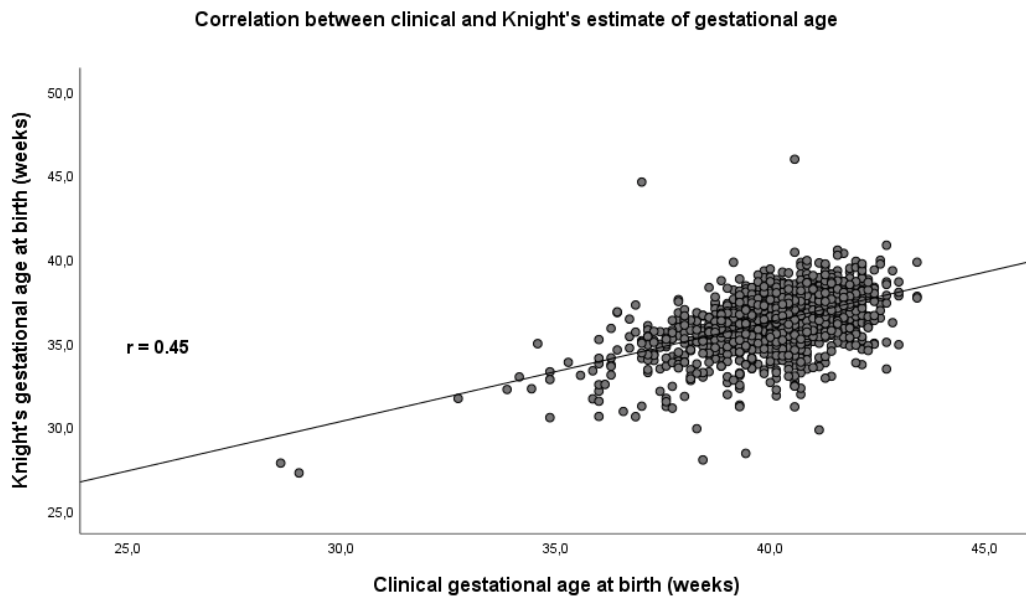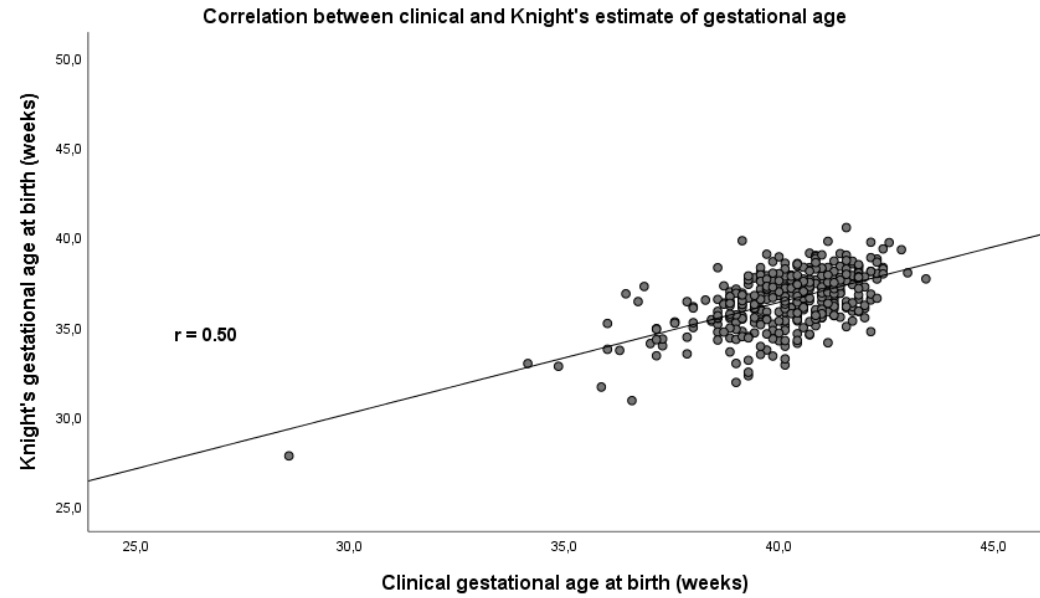

Panels show Spearman's correlation between gestational age at birth as determined by clinical methods (x-axes) and DNA methylation gestational age estimated by Bohlin's or Knight's epigenetic clock (y-axes) for gestational age.

**Upper left panel:** The correlation between clinical and DNA methylation gestational age calculated among all n=1335 newborns included in the analyses using Bohlin's clock.

**Upper right panel:** The correlation between clinical and DNA methylation gestational age using Bohlin's clock calculated among n=378 newborns of mothers with optimal pregnancy dating based on having a regular menstrual cycle and a known first date of last menstrual period.

**Lower left panel:** The correlation between clinical and DNA methylation gestational age calculated among all n=1346 newborns included in the analyses using Knight's clock.

**Lower right panel:** The correlation between clinical and DNA methylation gestational age using Knight's clock calculated among n=380 newborns of mothers with optimal pregnancy dating based on having a regular menstrual cycle and a known first date of last menstrual period.
